# Supplementary material
Source: MDPI journal article supplement (https://www.mdpi.com/2073-4441/13/23/3379)
Supplement: s1 [file s1]

**Table S1.** The comparison of different RFVL based models in forecasting SPI3 and SPI6 drought indices – Station 1

| Drought Indices | Input Comb.                        | Models | Training |       |                |       | Testing |       |                |       |
|-----------------|------------------------------------|--------|----------|-------|----------------|-------|---------|-------|----------------|-------|
|                 |                                    |        | RMSE     | MAE   | R <sup>2</sup> | NSE   | RMSE    | MAE   | R <sup>2</sup> | NSE   |
| SPI3            | SPI3t-1                            | RFVL   | 0.504    | 0.364 | 0.783          | 0.783 | 0.521   | 0.365 | 0.758          | 0.686 |
|                 |                                    | PSO    | 0.487    | 0.338 | 0.815          | 0.815 | 0.514   | 0.364 | 0.768          | 0.701 |
|                 |                                    | GA     | 0.485    | 0.340 | 0.817          | 0.817 | 0.512   | 0.361 | 0.768          | 0.705 |
|                 |                                    | GWO    | 0.483    | 0.338 | 0.819          | 0.819 | 0.510   | 0.352 | 0.795          | 0.710 |
|                 |                                    | SSO    | 0.479    | 0.337 | 0.827          | 0.827 | 0.502   | 0.358 | 0.786          | 0.725 |
|                 |                                    | SSA    | 0.454    | 0.317 | 0.865          | 0.865 | 0.500   | 0.344 | 0.805          | 0.731 |
|                 |                                    | HGS    | 0.433    | 0.292 | 0.887          | 0.887 | 0.489   | 0.337 | 0.815          | 0.752 |
|                 | SPI3t-1, SPI3t-2                   | RFVL   | 0.520    | 0.373 | 0.780          | 0.780 | 0.553   | 0.387 | 0.734          | 0.618 |
|                 |                                    | PSO    | 0.503    | 0.357 | 0.788          | 0.787 | 0.551   | 0.387 | 0.736          | 0.622 |
|                 |                                    | GA     | 0.501    | 0.353 | 0.789          | 0.789 | 0.551   | 0.385 | 0.736          | 0.623 |
|                 |                                    | GWO    | 0.492    | 0.351 | 0.806          | 0.806 | 0.549   | 0.384 | 0.734          | 0.626 |
|                 |                                    | SSO    | 0.480    | 0.339 | 0.825          | 0.825 | 0.542   | 0.381 | 0.742          | 0.641 |
|                 |                                    | SSA    | 0.473    | 0.334 | 0.835          | 0.835 | 0.541   | 0.380 | 0.754          | 0.644 |
|                 |                                    | HGS    | 0.465    | 0.324 | 0.849          | 0.849 | 0.537   | 0.374 | 0.776          | 0.653 |
| SPI6            | SPI6t-1, SPI6t-2                   | RFVL   | 0.504    | 0.364 | 0.824          | 0.734 | 0.507   | 0.369 | 0.756          | 0.639 |
|                 |                                    | PSO    | 0.443    | 0.278 | 0.858          | 0.848 | 0.450   | 0.299 | 0.791          | 0.748 |
|                 |                                    | GA     | 0.426    | 0.267 | 0.873          | 0.873 | 0.447   | 0.298 | 0.807          | 0.754 |
|                 |                                    | GWO    | 0.422    | 0.263 | 0.876          | 0.876 | 0.445   | 0.295 | 0.813          | 0.758 |
|                 |                                    | SSO    | 0.420    | 0.262 | 0.880          | 0.880 | 0.441   | 0.293 | 0.818          | 0.765 |
|                 |                                    | SSA    | 0.417    | 0.260 | 0.884          | 0.884 | 0.440   | 0.289 | 0.820          | 0.766 |
|                 |                                    | HGS    | 0.397    | 0.246 | 0.911          | 0.911 | 0.432   | 0.288 | 0.826          | 0.782 |
|                 | SPI6t-1, SPI6t-2, SPI6t-3, SPI6t-4 | RFVL   | 0.484    | 0.336 | 0.817          | 0.817 | 0.488   | 0.301 | 0.761          | 0.673 |
|                 |                                    | PSO    | 0.430    | 0.275 | 0.867          | 0.867 | 0.448   | 0.292 | 0.785          | 0.728 |
|                 |                                    | GA     | 0.421    | 0.269 | 0.879          | 0.879 | 0.441   | 0.289 | 0.794          | 0.738 |
|                 |                                    | GWO    | 0.408    | 0.260 | 0.897          | 0.897 | 0.440   | 0.287 | 0.808          | 0.755 |
|                 |                                    | SSO    | 0.392    | 0.257 | 0.915          | 0.915 | 0.437   | 0.283 | 0.811          | 0.760 |
|                 |                                    | SSA    | 0.386    | 0.250 | 0.923          | 0.923 | 0.433   | 0.279 | 0.819          | 0.771 |
|                 |                                    | HGS    | 0.372    | 0.230 | 0.939          | 0.939 | 0.430   | 0.275 | 0.829          | 0.782 |

**Table S2.** The comparison of different RFVL based models in forecasting SPI3 and SPI6 drought indices – Station 3

| Drought Indices | Input Comb.                        | Models | Training |       |                |       | Testing |       |                |       |
|-----------------|------------------------------------|--------|----------|-------|----------------|-------|---------|-------|----------------|-------|
|                 |                                    |        | RMSE     | MAE   | R <sup>2</sup> | NSE   | RMSE    | MAE   | R <sup>2</sup> | NSE   |
| SPI3            | SPI3t-1                            | RFVL   | 0.472    | 0.323 | 0.778          | 0.778 | 0.548   | 0.371 | 0.764          | 0.727 |
|                 |                                    | PSO    | 0.462    | 0.315 | 0.795          | 0.795 | 0.547   | 0.369 | 0.770          | 0.730 |
|                 |                                    | GA     | 0.452    | 0.308 | 0.815          | 0.815 | 0.545   | 0.366 | 0.768          | 0.733 |
|                 |                                    | GWO    | 0.448    | 0.305 | 0.820          | 0.820 | 0.530   | 0.363 | 0.798          | 0.760 |
|                 |                                    | SSO    | 0.438    | 0.290 | 0.835          | 0.835 | 0.520   | 0.352 | 0.810          | 0.779 |
|                 |                                    | SSA    | 0.434    | 0.287 | 0.841          | 0.841 | 0.519   | 0.354 | 0.811          | 0.781 |
|                 |                                    | HGS    | 0.405    | 0.263 | 0.888          | 0.888 | 0.515   | 0.351 | 0.814          | 0.785 |
|                 | SPI3t-1, SPI3t-2                   | RFVL   | 0.480    | 0.334 | 0.764          | 0.764 | 0.609   | 0.431 | 0.732          | 0.610 |
|                 |                                    | PSO    | 0.479    | 0.332 | 0.768          | 0.768 | 0.576   | 0.392 | 0.745          | 0.675 |
|                 |                                    | GA     | 0.474    | 0.331 | 0.770          | 0.770 | 0.569   | 0.385 | 0.765          | 0.689 |
|                 |                                    | GWO    | 0.471    | 0.328 | 0.772          | 0.772 | 0.566   | 0.382 | 0.775          | 0.695 |
|                 |                                    | SSO    | 0.467    | 0.321 | 0.786          | 0.786 | 0.530   | 0.355 | 0.800          | 0.760 |
|                 |                                    | SSA    | 0.463    | 0.317 | 0.793          | 0.793 | 0.548   | 0.370 | 0.769          | 0.727 |
|                 |                                    | HGS    | 0.461    | 0.315 | 0.796          | 0.796 | 0.530   | 0.355 | 0.800          | 0.760 |
| SPI6            | SPI6t-1, SPI6t-2                   | RFVL   | 0.448    | 0.282 | 0.816          | 0.816 | 0.558   | 0.340 | 0.734          | 0.663 |
|                 |                                    | PSO    | 0.444    | 0.283 | 0.819          | 0.819 | 0.458   | 0.279 | 0.810          | 0.756 |
|                 |                                    | GA     | 0.441    | 0.281 | 0.825          | 0.825 | 0.452   | 0.280 | 0.808          | 0.766 |
|                 |                                    | GWO    | 0.436    | 0.280 | 0.833          | 0.833 | 0.444   | 0.258 | 0.813          | 0.779 |
|                 |                                    | SSO    | 0.417    | 0.262 | 0.864          | 0.864 | 0.434   | 0.268 | 0.818          | 0.805 |
|                 |                                    | SSA    | 0.414    | 0.260 | 0.868          | 0.868 | 0.427   | 0.250 | 0.823          | 0.808 |
|                 |                                    | HGS    | 0.408    | 0.253 | 0.878          | 0.878 | 0.426   | 0.251 | 0.828          | 0.809 |
|                 | SPI6t-1, SPI6t-2, SPI6t-3, SPI6t-4 | RFVL   | 0.445    | 0.284 | 0.820          | 0.820 | 0.511   | 0.322 | 0.768          | 0.706 |
|                 |                                    | PSO    | 0.426    | 0.272 | 0.853          | 0.853 | 0.471   | 0.292 | 0.779          | 0.734 |
|                 |                                    | GA     | 0.422    | 0.269 | 0.859          | 0.859 | 0.445   | 0.276 | 0.811          | 0.777 |
|                 |                                    | GWO    | 0.382    | 0.238 | 0.917          | 0.917 | 0.439   | 0.271 | 0.818          | 0.788 |
|                 |                                    | SSO    | 0.361    | 0.221 | 0.948          | 0.948 | 0.428   | 0.259 | 0.823          | 0.796 |
|                 |                                    | SSA    | 0.356    | 0.222 | 0.955          | 0.955 | 0.426   | 0.248 | 0.835          | 0.809 |
|                 |                                    | HGS    | 0.331    | 0.196 | 0.969          | 0.969 | 0.422   | 0.237 | 0.841          | 0.815 |

**Table S3.** The comparison of different RFVL based models in forecasting SPI9 and SPI12 drought indices – Station 1

| Drought Indices | Input Comb.                                      | Models | Training |       |                |       | Testing |       |                |       |
|-----------------|--------------------------------------------------|--------|----------|-------|----------------|-------|---------|-------|----------------|-------|
|                 |                                                  |        | RMSE     | MAE   | R <sup>2</sup> | NSE   | RMSE    | MAE   | R <sup>2</sup> | NSE   |
| SPI9            | SPI9t-1, SPI9t-2, SPI9t-3,                       | RFVL   | 0.467    | 0.317 | 0.859          | 0.859 | 0.495   | 0.344 | 0.766          | 0.747 |
|                 |                                                  | PSO    | 0.449    | 0.311 | 0.863          | 0.863 | 0.493   | 0.339 | 0.769          | 0.749 |
|                 |                                                  | GA     | 0.448    | 0.310 | 0.864          | 0.864 | 0.488   | 0.335 | 0.775          | 0.757 |
|                 |                                                  | GWO    | 0.444    | 0.306 | 0.869          | 0.869 | 0.479   | 0.322 | 0.835          | 0.790 |
|                 |                                                  | SSO    | 0.417    | 0.290 | 0.894          | 0.894 | 0.447   | 0.305 | 0.825          | 0.817 |
|                 |                                                  | SSA    | 0.406    | 0.283 | 0.901          | 0.904 | 0.433   | 0.300 | 0.836          | 0.826 |
|                 |                                                  | HGS    | 0.395    | 0.276 | 0.910          | 0.910 | 0.425   | 0.294 | 0.845          | 0.835 |
|                 | SPI9t-1, SPI9t-2, SPI9t-3, SPI9t-4, SPI9t-5      | RFVL   | 0.476    | 0.336 | 0.847          | 0.847 | 0.592   | 0.416 | 0.650          | 0.588 |
|                 |                                                  | PSO    | 0.466    | 0.316 | 0.860          | 0.860 | 0.517   | 0.351 | 0.768          | 0.726 |
|                 |                                                  | GA     | 0.464    | 0.313 | 0.862          | 0.862 | 0.500   | 0.352 | 0.791          | 0.755 |
|                 |                                                  | GWO    | 0.461    | 0.310 | 0.865          | 0.865 | 0.485   | 0.333 | 0.778          | 0.761 |
|                 |                                                  | SSO    | 0.440    | 0.302 | 0.884          | 0.884 | 0.478   | 0.322 | 0.834          | 0.791 |
|                 |                                                  | SSA    | 0.432    | 0.298 | 0.892          | 0.892 | 0.476   | 0.315 | 0.833          | 0.794 |
|                 |                                                  | HGS    | 0.428    | 0.296 | 0.896          | 0.896 | 0.463   | 0.314 | 0.828          | 0.815 |
| SPI12           | SPI12t-1, SPI12t-2, SPI12t-3,                    | RFVL   | 0.441    | 0.293 | 0.882          | 0.882 | 0.525   | 0.383 | 0.689          | 0.647 |
|                 |                                                  | PSO    | 0.348    | 0.242 | 0.950          | 0.950 | 0.429   | 0.299 | 0.821          | 0.794 |
|                 |                                                  | GA     | 0.341    | 0.236 | 0.956          | 0.956 | 0.420   | 0.298 | 0.841          | 0.805 |
|                 |                                                  | GWO    | 0.347    | 0.235 | 0.952          | 0.952 | 0.429   | 0.299 | 0.821          | 0.794 |
|                 |                                                  | SSO    | 0.327    | 0.226 | 0.966          | 0.966 | 0.388   | 0.264 | 0.870          | 0.846 |
|                 |                                                  | SSA    | 0.323    | 0.222 | 0.969          | 0.969 | 0.410   | 0.283 | 0.845          | 0.818 |
|                 |                                                  | HGS    | 0.302    | 0.209 | 0.983          | 0.983 | 0.387   | 0.263 | 0.870          | 0.847 |
|                 | SPI12t-1, SPI12t-2, SPI12t-3, SPI12t-4, SPI12t-5 | RFVL   | 0.381    | 0.276 | 0.894          | 0.894 | 0.502   | 0.339 | 0.738          | 0.685 |
|                 |                                                  | PSO    | 0.344    | 0.243 | 0.953          | 0.953 | 0.409   | 0.299 | 0.836          | 0.819 |
|                 |                                                  | GA     | 0.340    | 0.241 | 0.957          | 0.957 | 0.400   | 0.270 | 0.848          | 0.831 |
|                 |                                                  | GWO    | 0.328    | 0.235 | 0.964          | 0.964 | 0.398   | 0.268 | 0.854          | 0.834 |
|                 |                                                  | SSO    | 0.319    | 0.219 | 0.971          | 0.971 | 0.390   | 0.262 | 0.864          | 0.844 |
|                 |                                                  | SSA    | 0.315    | 0.226 | 0.974          | 0.974 | 0.388   | 0.261 | 0.863          | 0.846 |
|                 |                                                  | HGS    | 0.299    | 0.212 | 0.985          | 0.985 | 0.379   | 0.235 | 0.876          | 0.857 |

**Table S4.** The comparison of different RFVL based models in forecasting SPI9 and SPI12 drought indices – Station 3

| Drought Indices | Input Comb.                                      | Models | Training |       |                |       | Testing |       |                |       |
|-----------------|--------------------------------------------------|--------|----------|-------|----------------|-------|---------|-------|----------------|-------|
|                 |                                                  |        | RMSE     | MAE   | R <sup>2</sup> | NSE   | RMSE    | MAE   | R <sup>2</sup> | NSE   |
| SPI9            | SPI9t-1, SPI9t-2, SPI9t-3,                       | RFVL   | 0.273    | 0.138 | 0.828          | 0.828 | 0.393   | 0.193 | 0.795          | 0.779 |
|                 |                                                  | PSO    | 0.271    | 0.133 | 0.830          | 0.830 | 0.366   | 0.160 | 0.833          | 0.812 |
|                 |                                                  | GA     | 0.269    | 0.128 | 0.833          | 0.833 | 0.357   | 0.153 | 0.836          | 0.824 |
|                 |                                                  | GWO    | 0.261    | 0.122 | 0.843          | 0.842 | 0.350   | 0.149 | 0.842          | 0.831 |
|                 |                                                  | SSO    | 0.222    | 0.111 | 0.884          | 0.884 | 0.340   | 0.145 | 0.855          | 0.842 |
|                 |                                                  | SSA    | 0.212    | 0.109 | 0.893          | 0.893 | 0.337   | 0.142 | 0.867          | 0.846 |
|                 |                                                  | HGS    | 0.206    | 0.104 | 0.910          | 0.910 | 0.333   | 0.137 | 0.873          | 0.849 |
|                 | SPI9t-1, SPI9t-2, SPI9t-3, SPI9t-4, SPI9t-5      | RFVL   | 0.294    | 0.149 | 0.806          | 0.806 | 0.422   | 0.218 | 0.762          | 0.742 |
|                 |                                                  | PSO    | 0.274    | 0.127 | 0.827          | 0.827 | 0.411   | 0.216 | 0.783          | 0.756 |
|                 |                                                  | GA     | 0.269    | 0.125 | 0.832          | 0.832 | 0.404   | 0.200 | 0.786          | 0.762 |
|                 |                                                  | GWO    | 0.261    | 0.121 | 0.842          | 0.842 | 0.360   | 0.172 | 0.841          | 0.819 |
|                 |                                                  | SSO    | 0.248    | 0.117 | 0.856          | 0.856 | 0.355   | 0.155 | 0.852          | 0.835 |
|                 |                                                  | SSA    | 0.229    | 0.109 | 0.873          | 0.873 | 0.346   | 0.152 | 0.854          | 0.821 |
|                 |                                                  | HGS    | 0.223    | 0.107 | 0.886          | 0.886 | 0.337   | 0.150 | 0.855          | 0.839 |
| SPI12           | SPI12t-1, SPI12t-2, SPI12t-3,                    | RFVL   | 0.299    | 0.163 | 0.847          | 0.847 | 0.366   | 0.195 | 0.831          | 0.804 |
|                 |                                                  | PSO    | 0.289    | 0.156 | 0.866          | 0.866 | 0.325   | 0.173 | 0.838          | 0.827 |
|                 |                                                  | GA     | 0.284    | 0.152 | 0.873          | 0.872 | 0.297   | 0.139 | 0.849          | 0.836 |
|                 |                                                  | GWO    | 0.279    | 0.148 | 0.877          | 0.877 | 0.294   | 0.131 | 0.862          | 0.847 |
|                 |                                                  | SSO    | 0.261    | 0.142 | 0.902          | 0.902 | 0.289   | 0.128 | 0.869          | 0.853 |
|                 |                                                  | SSA    | 0.245    | 0.131 | 0.906          | 0.906 | 0.284   | 0.123 | 0.872          | 0.858 |
|                 |                                                  | HGS    | 0.229    | 0.118 | 0.919          | 0.919 | 0.281   | 0.127 | 0.891          | 0.876 |
|                 | SPI12t-1, SPI12t-2, SPI12t-3, SPI12t-4, SPI12t-5 | RFVL   | 0.293    | 0.158 | 0.858          | 0.858 | 0.318   | 0.156 | 0.833          | 0.806 |
|                 |                                                  | PSO    | 0.287    | 0.154 | 0.869          | 0.869 | 0.300   | 0.148 | 0.856          | 0.841 |
|                 |                                                  | GA     | 0.281    | 0.148 | 0.875          | 0.875 | 0.295   | 0.137 | 0.859          | 0.844 |
|                 |                                                  | GWO    | 0.262    | 0.144 | 0.888          | 0.888 | 0.288   | 0.128 | 0.867          | 0.849 |
|                 |                                                  | SSO    | 0.247    | 0.133 | 0.905          | 0.905 | 0.285   | 0.124 | 0.888          | 0.863 |
|                 |                                                  | SSA    | 0.240    | 0.128 | 0.911          | 0.911 | 0.281   | 0.121 | 0.890          | 0.872 |
|                 |                                                  | HGS    | 0.225    | 0.115 | 0.922          | 0.922 | 0.276   | 0.114 | 0.893          | 0.880 |

**Table S5.** The comparison of different RFVL based models in SPI6 drought estimation for the test period using Periodicity with optimal inputs

| Station   | Input Comb. | Models | Training |       |                |       | Testing |       |                |       |
|-----------|-------------|--------|----------|-------|----------------|-------|---------|-------|----------------|-------|
|           |             |        | RMSE     | MAE   | R <sup>2</sup> | NSE   | RMSE    | MAE   | R <sup>2</sup> | NSE   |
| Station 1 | OPT SPI6+MN | RFVL   | 0.478    | 0.319 | 0.821          | 0.820 | 0.475   | 0.329 | 0.766          | 0.683 |
|           |             | PSO    | 0.426    | 0.273 | 0.873          | 0.873 | 0.436   | 0.277 | 0.796          | 0.753 |
|           |             | GA     | 0.416    | 0.265 | 0.885          | 0.885 | 0.431   | 0.273 | 0.811          | 0.765 |
|           |             | GWO    | 0.405    | 0.251 | 0.901          | 0.901 | 0.424   | 0.266 | 0.818          | 0.767 |
|           |             | SSO    | 0.379    | 0.236 | 0.934          | 0.934 | 0.413   | 0.257 | 0.824          | 0.775 |
|           |             | SSA    | 0.364    | 0.225 | 0.953          | 0.953 | 0.406   | 0.255 | 0.828          | 0.777 |
|           |             | HGS    | 0.342    | 0.204 | 0.959          | 0.959 | 0.401   | 0.252 | 0.839          | 0.790 |
| Station 2 | OPT SPI6+MN | RFVL   | 0.442    | 0.281 | 0.824          | 0.824 | 0.508   | 0.318 | 0.771          | 0.709 |
|           |             | PSO    | 0.423    | 0.268 | 0.857          | 0.857 | 0.467   | 0.289 | 0.782          | 0.737 |
|           |             | GA     | 0.421    | 0.265 | 0.862          | 0.862 | 0.442   | 0.274 | 0.815          | 0.779 |
|           |             | GWO    | 0.380    | 0.235 | 0.921          | 0.921 | 0.436   | 0.267 | 0.820          | 0.790 |
|           |             | SSO    | 0.359    | 0.216 | 0.951          | 0.951 | 0.425   | 0.256 | 0.825          | 0.799 |
|           |             | SSA    | 0.354    | 0.214 | 0.959          | 0.959 | 0.424   | 0.245 | 0.838          | 0.811 |
|           |             | HGS    | 0.330    | 0.193 | 0.971          | 0.971 | 0.420   | 0.236 | 0.845          | 0.817 |
| Station 3 | OPT SPI6+MN | RFVL   | 0.442    | 0.281 | 0.824          | 0.824 | 0.508   | 0.318 | 0.771          | 0.709 |
|           |             | PSO    | 0.423    | 0.268 | 0.857          | 0.857 | 0.467   | 0.289 | 0.782          | 0.737 |
|           |             | GA     | 0.421    | 0.265 | 0.862          | 0.862 | 0.442   | 0.274 | 0.815          | 0.779 |
|           |             | GWO    | 0.380    | 0.235 | 0.921          | 0.921 | 0.436   | 0.267 | 0.820          | 0.790 |
|           |             | SSO    | 0.359    | 0.216 | 0.951          | 0.951 | 0.425   | 0.256 | 0.825          | 0.799 |
|           |             | SSA    | 0.354    | 0.214 | 0.959          | 0.959 | 0.424   | 0.245 | 0.838          | 0.811 |
|           |             | HGS    | 0.330    | 0.193 | 0.971          | 0.971 | 0.420   | 0.236 | 0.845          | 0.817 |

**Table S6.** The comparison of different RFVL based models in SPI9 drought estimation for the test period using Periodicity with optimal inputs

| Station   | Input Comb. | Models | Training |       |                |       | Testing |       |                |       |
|-----------|-------------|--------|----------|-------|----------------|-------|---------|-------|----------------|-------|
|           |             |        | RMSE     | MAE   | R <sup>2</sup> | NSE   | RMSE    | MAE   | R <sup>2</sup> | NSE   |
| Station 1 | OPT SPI9+MN | RFVL   | 0.465    | 0.315 | 0.868          | 0.868 | 0.491   | 0.341 | 0.775          | 0.756 |
|           |             | PSO    | 0.444    | 0.302 | 0.873          | 0.873 | 0.478   | 0.338 | 0.789          | 0.762 |
|           |             | GA     | 0.430    | 0.297 | 0.880          | 0.880 | 0.471   | 0.336 | 0.817          | 0.789 |
|           |             | GWO    | 0.410    | 0.281 | 0.895          | 0.895 | 0.452   | 0.305 | 0.827          | 0.806 |
|           |             | SSO    | 0.392    | 0.254 | 0.898          | 0.898 | 0.435   | 0.293 | 0.832          | 0.822 |
|           |             | SSA    | 0.375    | 0.247 | 0.904          | 0.904 | 0.419   | 0.280 | 0.851          | 0.843 |
|           |             | HGS    | 0.363    | 0.240 | 0.915          | 0.915 | 0.409   | 0.244 | 0.854          | 0.848 |
| Station 2 | OPT SPI9+MN | RFVL   | 0.391    | 0.240 | 0.799          | 0.799 | 0.426   | 0.289 | 0.792          | 0.762 |
|           |             | PSO    | 0.389    | 0.238 | 0.803          | 0.803 | 0.398   | 0.285 | 0.818          | 0.803 |
|           |             | GA     | 0.385    | 0.235 | 0.805          | 0.805 | 0.395   | 0.275 | 0.828          | 0.809 |
|           |             | GWO    | 0.376    | 0.233 | 0.819          | 0.819 | 0.383   | 0.264 | 0.833          | 0.813 |
|           |             | SSO    | 0.342    | 0.216 | 0.855          | 0.855 | 0.375   | 0.260 | 0.835          | 0.814 |
|           |             | SSA    | 0.310    | 0.185 | 0.882          | 0.882 | 0.372   | 0.256 | 0.836          | 0.818 |
|           |             | HGS    | 0.305    | 0.183 | 0.891          | 0.891 | 0.370   | 0.253 | 0.844          | 0.825 |
| Station 3 | OPT SPI9+MN | RFVL   | 0.271    | 0.134 | 0.833          | 0.833 | 0.390   | 0.190 | 0.799          | 0.783 |
|           |             | PSO    | 0.267    | 0.130 | 0.835          | 0.835 | 0.364   | 0.157 | 0.837          | 0.815 |
|           |             | GA     | 0.265    | 0.126 | 0.838          | 0.838 | 0.355   | 0.150 | 0.840          | 0.827 |
|           |             | GWO    | 0.256    | 0.120 | 0.846          | 0.846 | 0.346   | 0.148 | 0.845          | 0.834 |
|           |             | SSO    | 0.228    | 0.114 | 0.880          | 0.880 | 0.342   | 0.146 | 0.852          | 0.840 |
|           |             | SSA    | 0.215    | 0.111 | 0.890          | 0.890 | 0.339   | 0.144 | 0.864          | 0.843 |
|           |             | HGS    | 0.210    | 0.107 | 0.904          | 0.904 | 0.337   | 0.139 | 0.870          | 0.845 |

**Table S7.** The comparison of different RFVL based models in SPI12 drought estimation for the test period using Periodicity with optimal inputs

| Station   | Input Comb.   | Models | Training |       |                |       | Testing |       |                |       |
|-----------|---------------|--------|----------|-------|----------------|-------|---------|-------|----------------|-------|
|           |               |        | RMSE     | MAE   | R <sup>2</sup> | NSE   | RMSE    | MAE   | R <sup>2</sup> | NSE   |
| Station 1 | OPT SPI12+M N | RFVL   | 0.374    | 0.273 | 0.900          | 0.899 | 0.495   | 0.336 | 0.744          | 0.689 |
|           |               | PSO    | 0.341    | 0.241 | 0.956          | 0.956 | 0.401   | 0.294 | 0.839          | 0.822 |
|           |               | GA     | 0.334    | 0.238 | 0.962          | 0.962 | 0.397   | 0.267 | 0.852          | 0.835 |
|           |               | GWO    | 0.324    | 0.233 | 0.967          | 0.967 | 0.394   | 0.266 | 0.858          | 0.840 |
|           |               | SSO    | 0.321    | 0.230 | 0.969          | 0.969 | 0.392   | 0.264 | 0.860          | 0.841 |
|           |               | SSA    | 0.318    | 0.228 | 0.970          | 0.970 | 0.390   | 0.263 | 0.861          | 0.843 |
|           |               | HGS    | 0.303    | 0.219 | 0.979          | 0.979 | 0.385   | 0.243 | 0.868          | 0.851 |
| Station 2 | OPT SPI12+M N | RFVL   | 0.295    | 0.163 | 0.901          | 0.901 | 0.342   | 0.206 | 0.795          | 0.781 |
|           |               | PSO    | 0.292    | 0.160 | 0.904          | 0.904 | 0.332   | 0.211 | 0.805          | 0.793 |
|           |               | GA     | 0.290    | 0.158 | 0.905          | 0.905 | 0.323   | 0.201 | 0.816          | 0.803 |
|           |               | GWO    | 0.281    | 0.155 | 0.917          | 0.917 | 0.300   | 0.178 | 0.844          | 0.823 |
|           |               | SSO    | 0.249    | 0.144 | 0.943          | 0.943 | 0.289   | 0.166 | 0.871          | 0.845 |
|           |               | SSA    | 0.244    | 0.138 | 0.951          | 0.951 | 0.275   | 0.158 | 0.881          | 0.856 |
|           |               | HGS    | 0.228    | 0.121 | 0.962          | 0.962 | 0.264   | 0.154 | 0.884          | 0.868 |
| Station 3 | OPT SPI12+M N | RFVL   | 0.291    | 0.158 | 0.858          | 0.858 | 0.315   | 0.153 | 0.837          | 0.810 |
|           |               | PSO    | 0.284    | 0.154 | 0.869          | 0.869 | 0.297   | 0.145 | 0.859          | 0.844 |
|           |               | GA     | 0.278    | 0.148 | 0.875          | 0.875 | 0.291   | 0.134 | 0.864          | 0.848 |
|           |               | GWO    | 0.258    | 0.141 | 0.888          | 0.888 | 0.287   | 0.125 | 0.870          | 0.855 |
|           |               | SSO    | 0.250    | 0.138 | 0.905          | 0.905 | 0.287   | 0.126 | 0.883          | 0.860 |
|           |               | SSA    | 0.244    | 0.133 | 0.907          | 0.907 | 0.284   | 0.124 | 0.886          | 0.868 |
|           |               | HGS    | 0.229    | 0.125 | 0.912          | 0.912 | 0.280   | 0.118 | 0.890          | 0.876 |

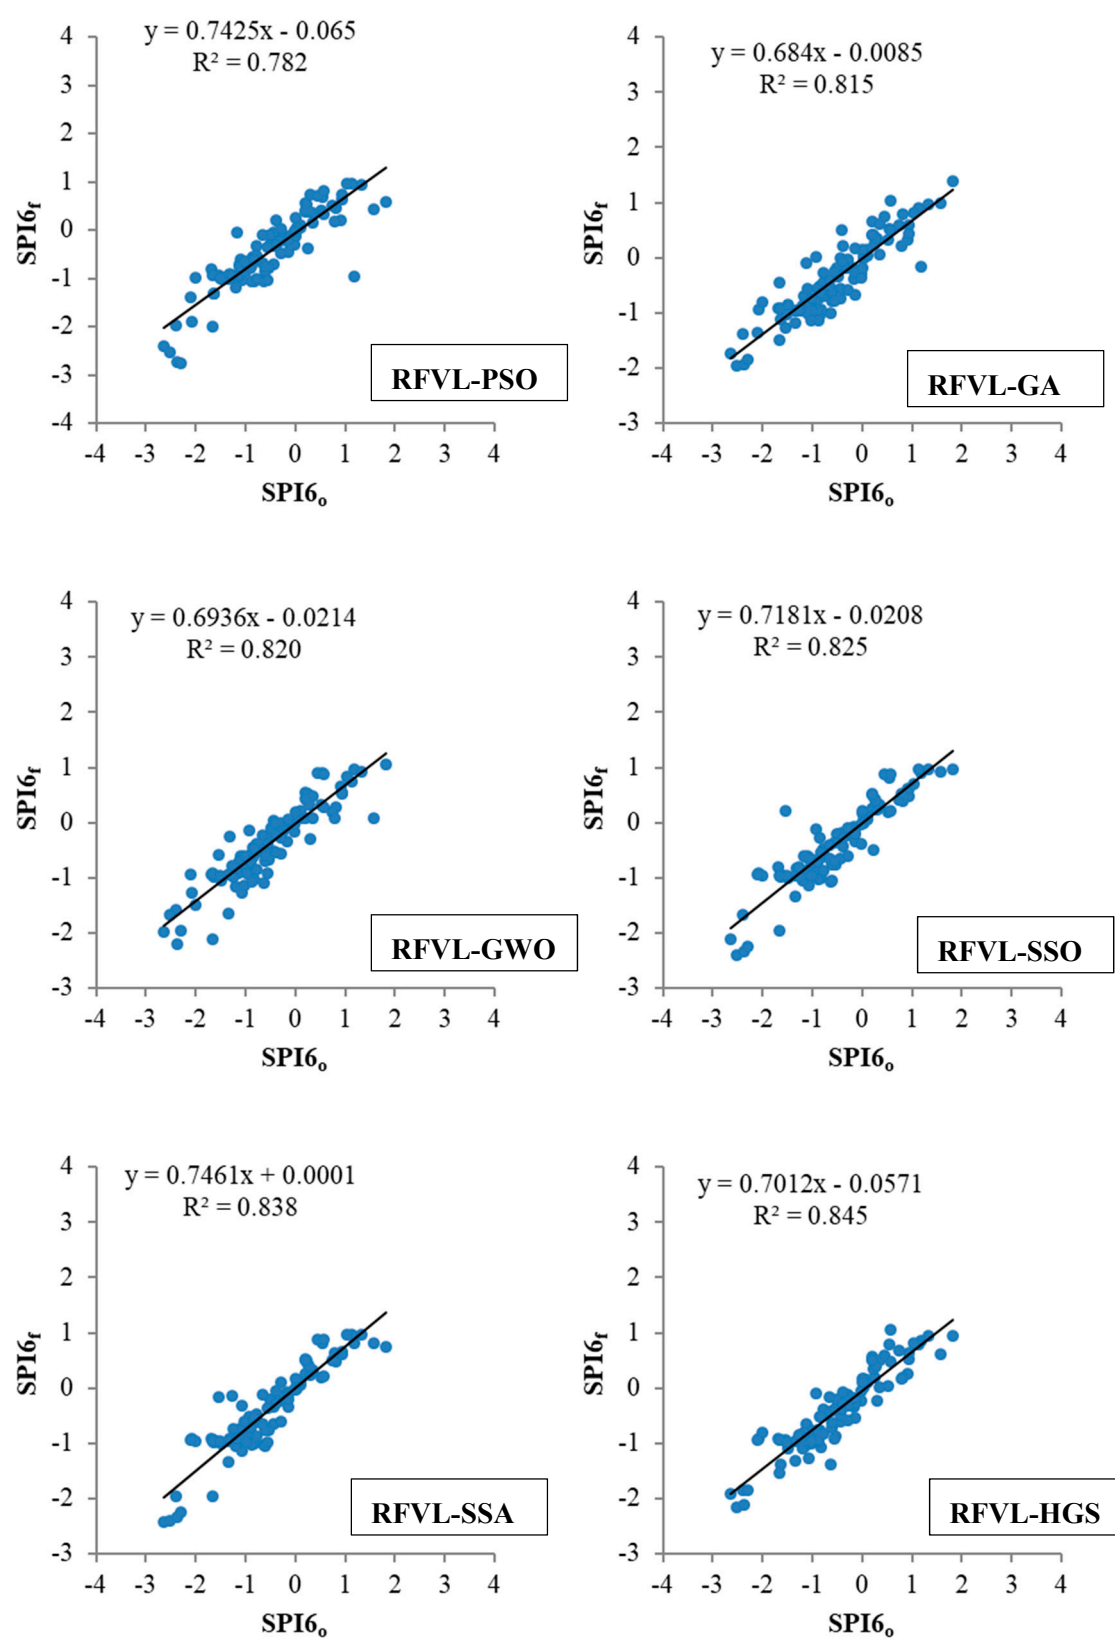

**Figure S1.** Scatterplots of the observed and predicted SPI6 drought index by different RFVL based models in the test period –Station 2



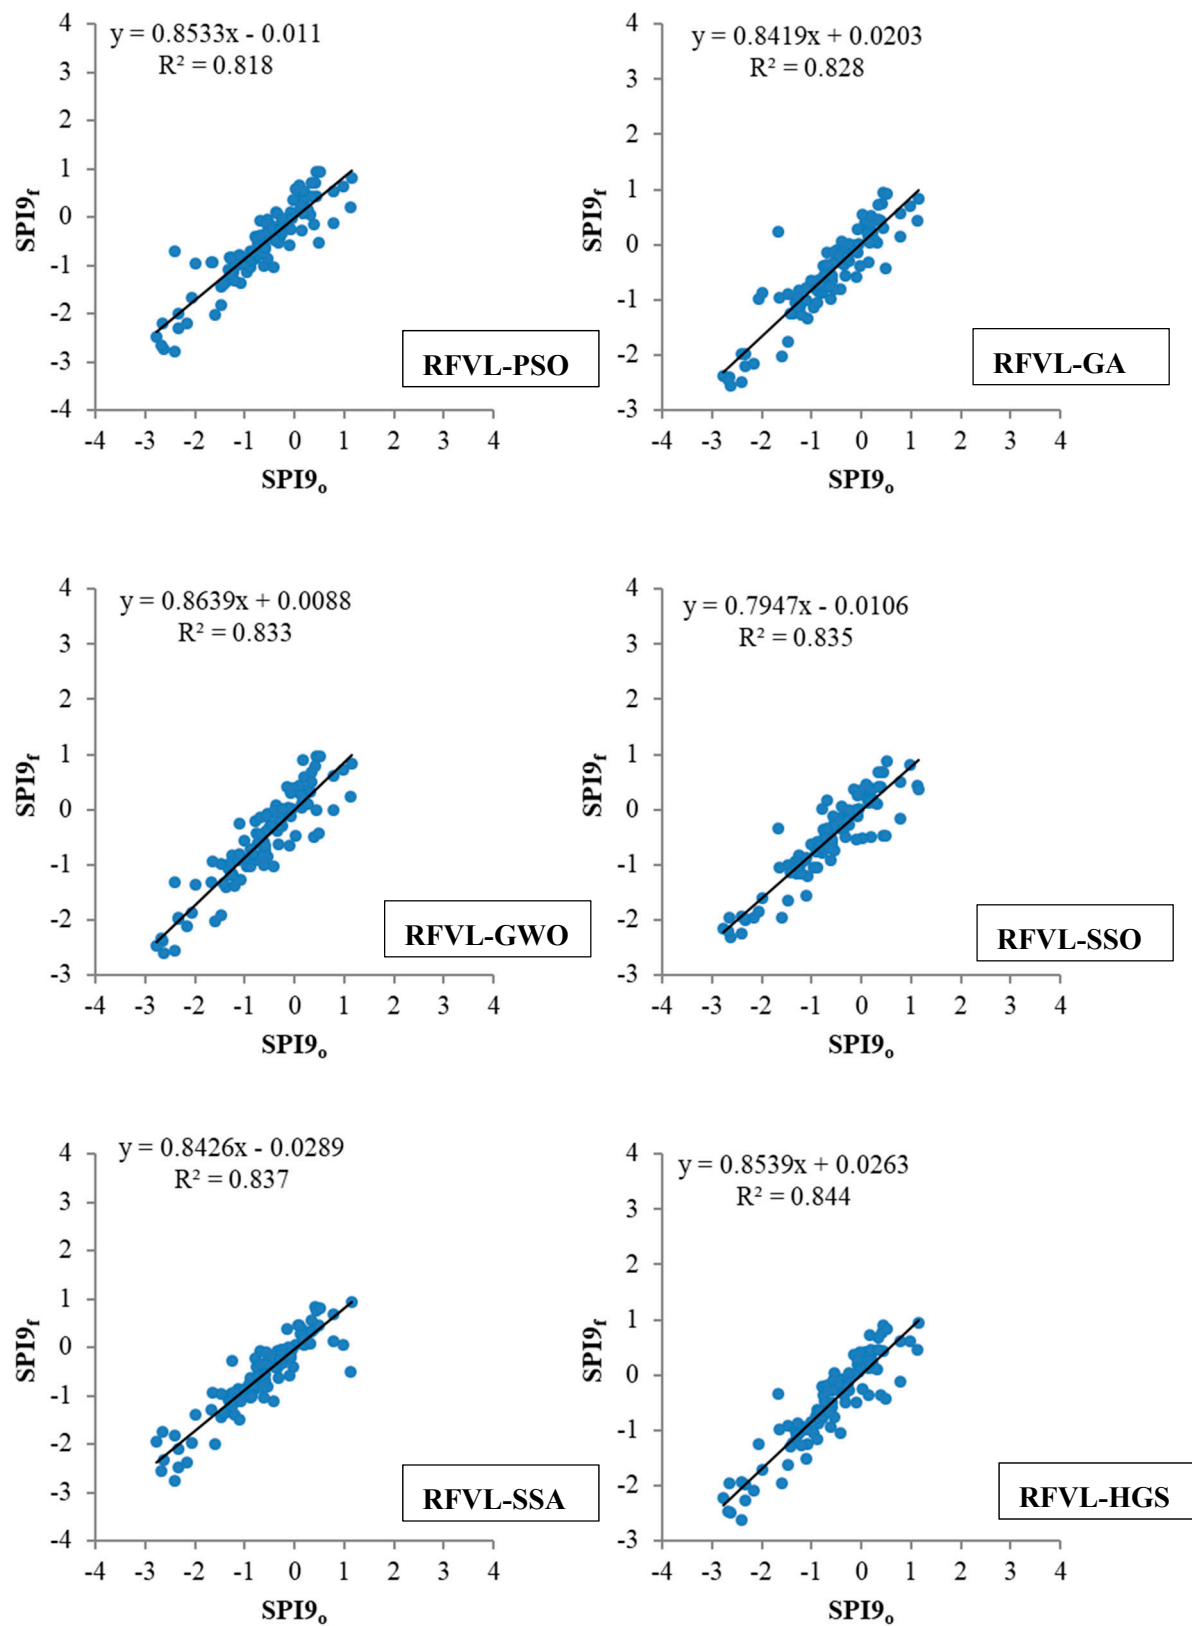

**Figure S2.** Scatterplots of the observed and predicted SPI9 drought index by different RFVL based models in the test period –Station 2

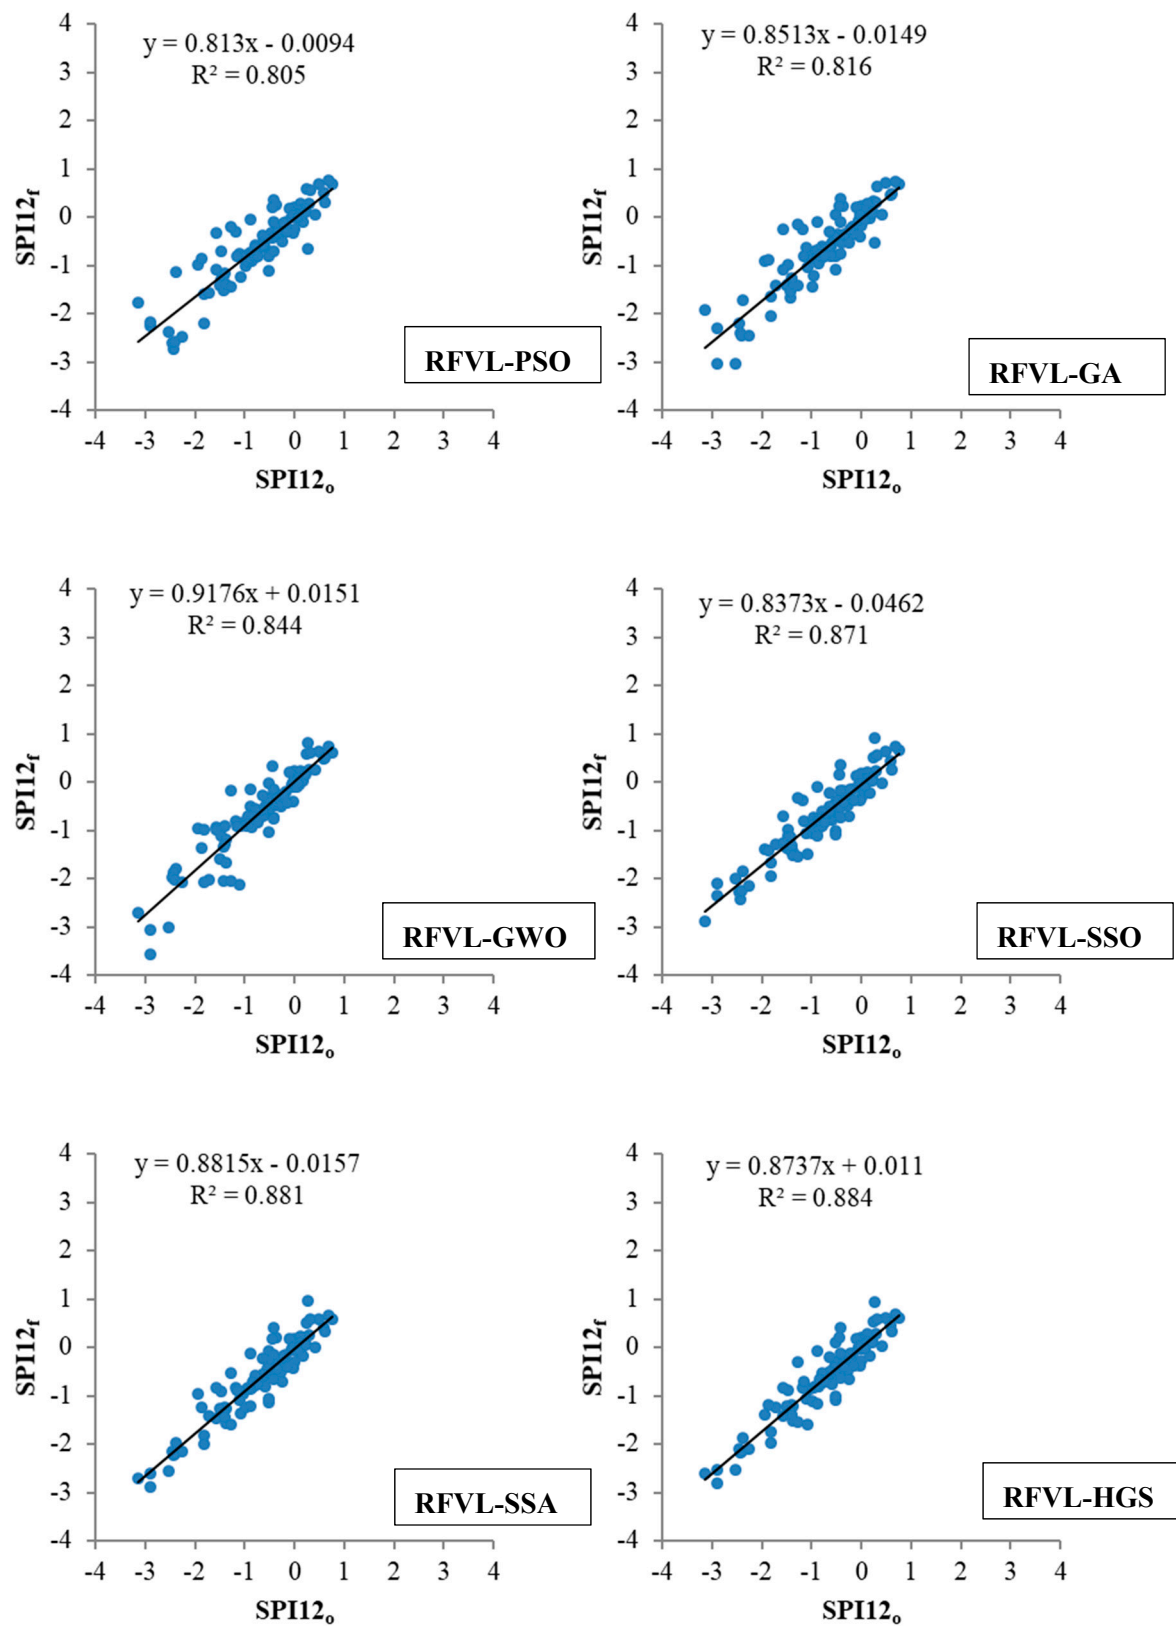

**Figure S3.** Scatterplots of the observed and predicted SPI12 drought index by different RFVL based models in the test period –Station 2

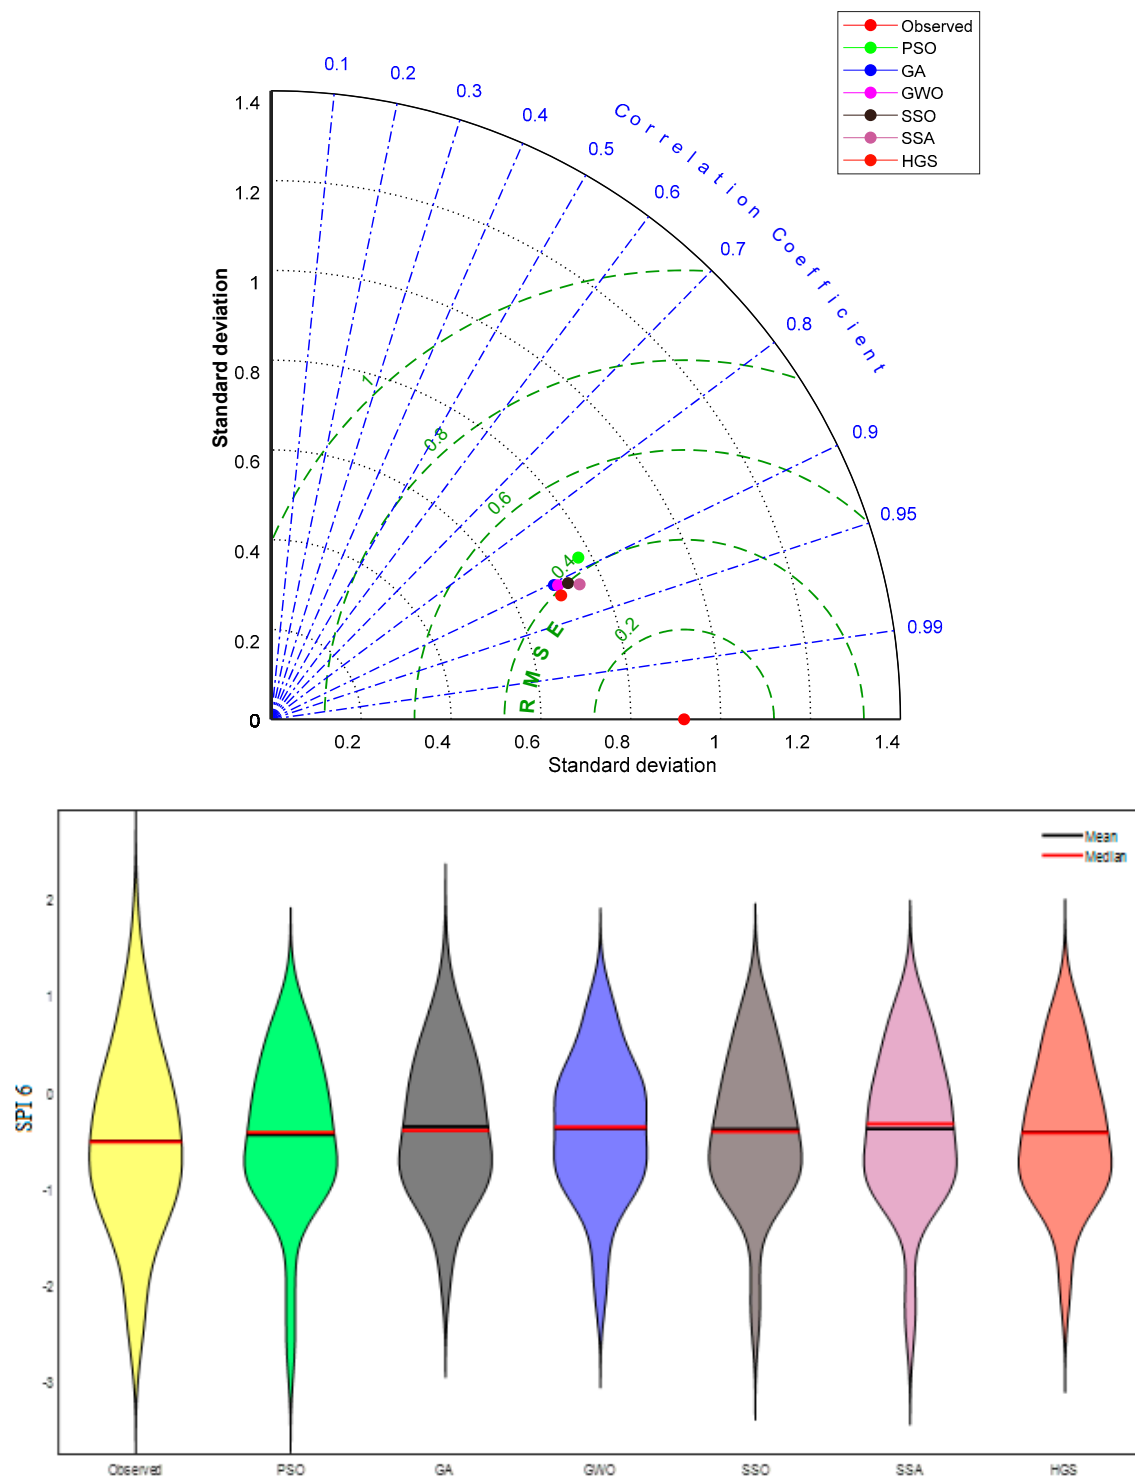

**Figure S4.** Taylor and Violin diagrams of SPI6 drought index by different RFVL based models in the test period –Station 2

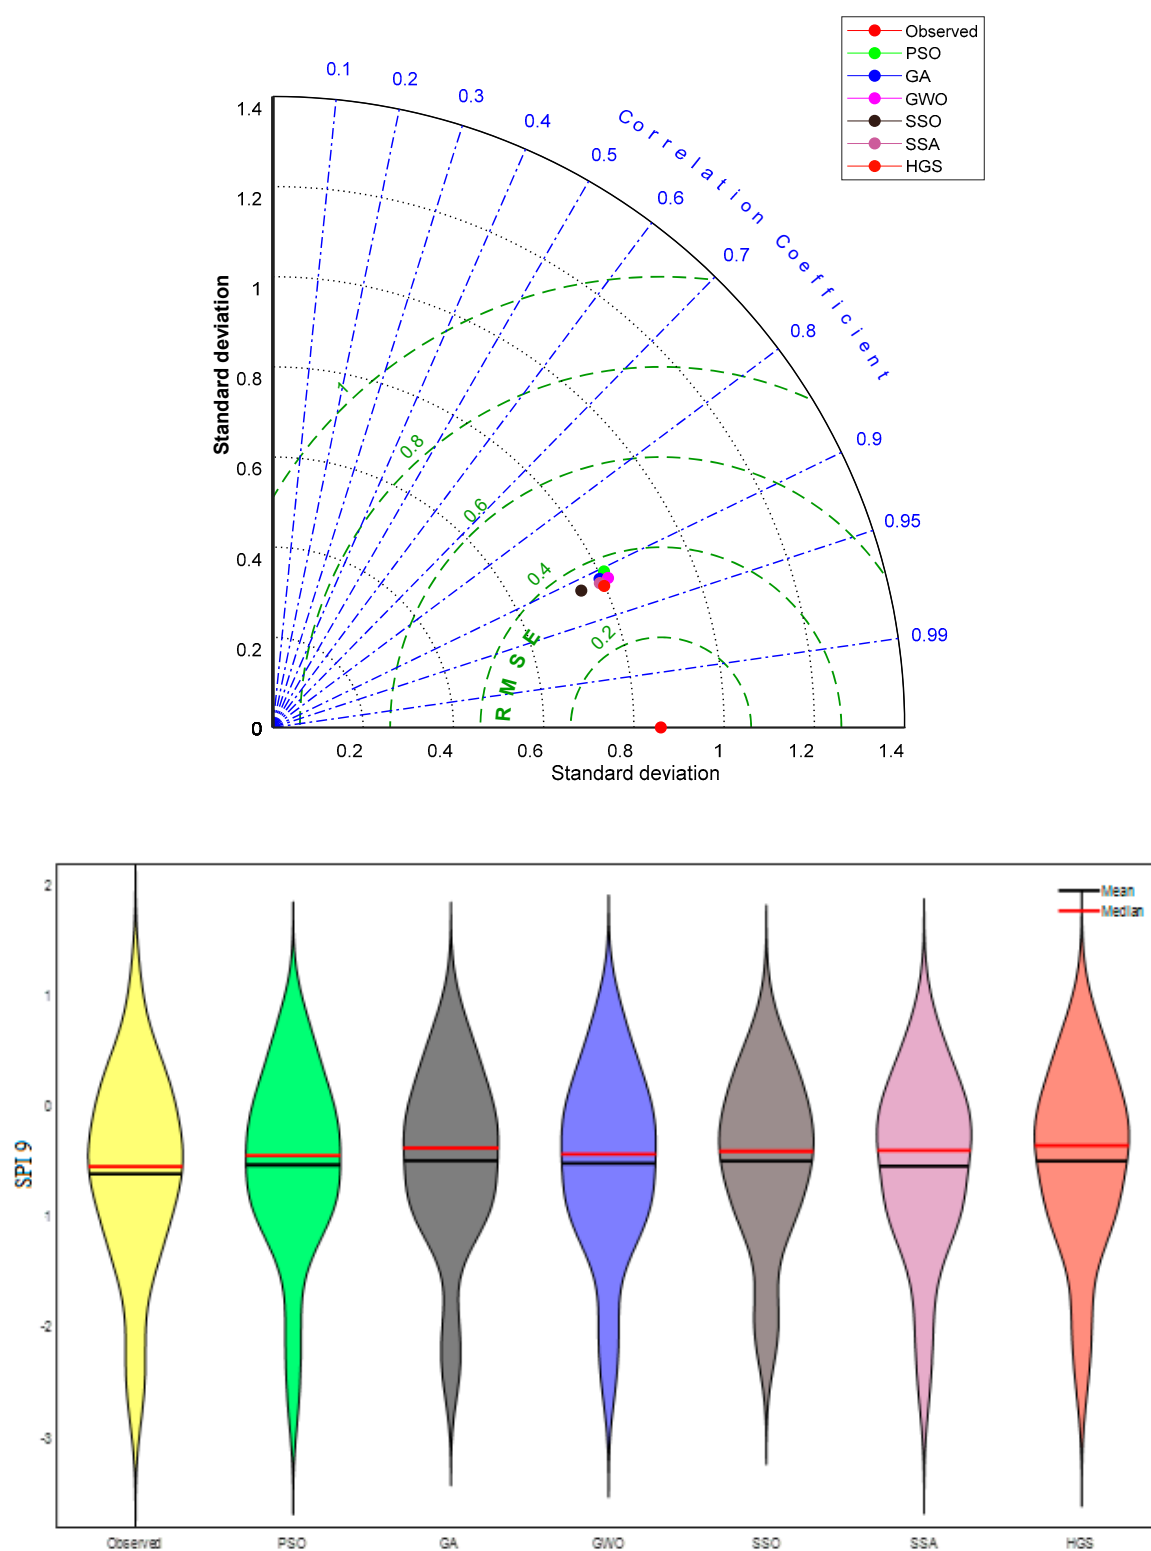

**Figure S5.** Taylor and Violin diagrams of SPI9 drought index by different RFVL based models in the test period –Station 2

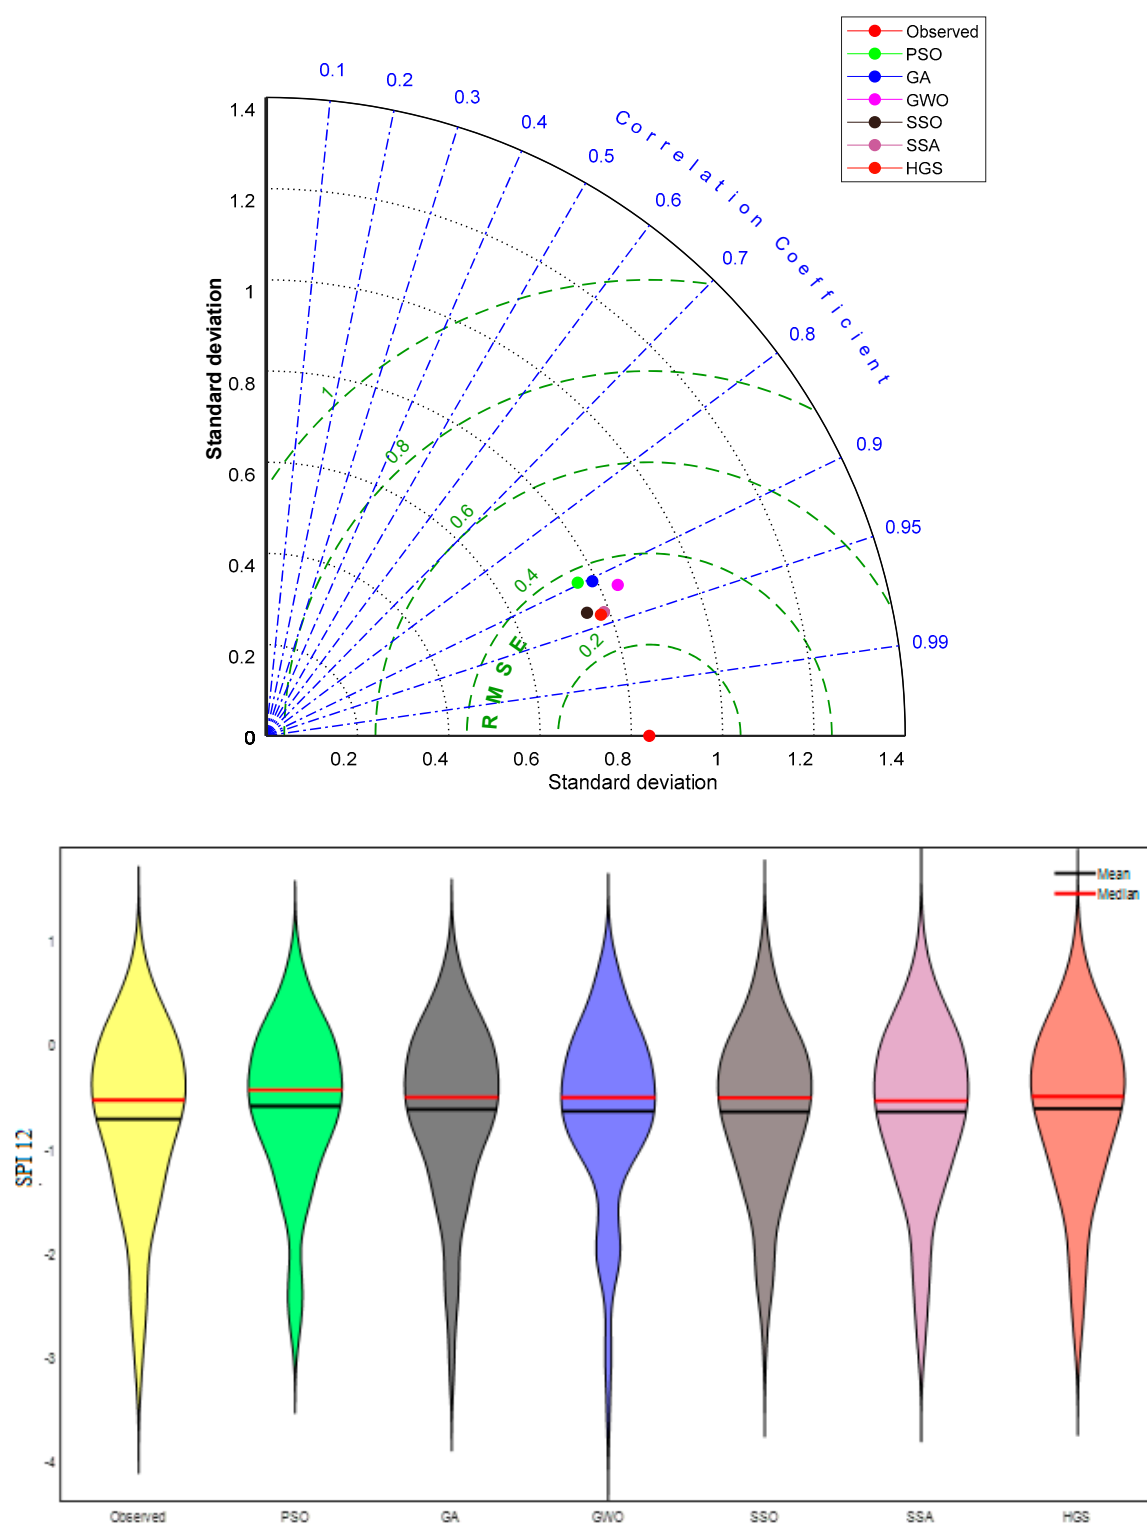

**Figure S6.** Taylor and Violin diagrams of SPI12 drought index by different RFVL based models in the test period –Station 2
